# Supplementary material for: Rod-coating all-solution fabrication of double functional graphene oxide films for flexible alternating current (AC)-driven light-emitting diodes
Source: Royal Society of Chemistry journal article supplement (doi:10.1039/c4ra06147k), 2014-10-21
Supplement: c4ra06147k1.pdf [file c4ra06147k1.pdf]

## Supporting Information

### **Rod-Coating All-Solution Fabrication of Double Functional Graphene Oxide Films for Flexible Alternating Current (AC) - Driven Light-Emitting Diodes**

Yang Yang,<sup>a,d</sup> Zhengdong Liu,<sup>a</sup> Zongyou Yin,<sup>\*b</sup> Zehui Du,<sup>c</sup> Linghai Xie,<sup>\*a</sup> Mingdong Yi,<sup>a</sup> Juqing Liu,<sup>d</sup> and Wei Huang<sup>\*a,d</sup>

<sup>a</sup> *Center for Molecular Systems and Organic Devices (CMSOD), Key Laboratory for Organic Electronics & Information Displays (KLOEID), Institute of Advanced Materials (IAM), Nanjing University of Posts & Telecommunications, 9 Wenyuan Road, Nanjing 210046, China.*

<sup>b</sup> *School of Materials Science and Engineering, Nanyang Technological University, 50 Nanyang Avenue, Singapore 639798, Singapore*

<sup>c</sup> *Temasek laboratories, Nanyang Technological University, Nanyang Drive, Singapore 637553, Singapore.*

<sup>d</sup> *Jiangsu-Singapore Joint Research Center for Organic/Bio- Electronics & Information Displays, Institute of Advanced Materials, Nanjing University of Technology, Nanjing 211816, China.*

\*Corresponding author, E-mail: iamwhuang@njupt.edu.cn; iamlhxie@njupt.edu.cn; zongyouy@gmail.com  
Fax: 25 5813 9988; Tel: 25 5813 9001

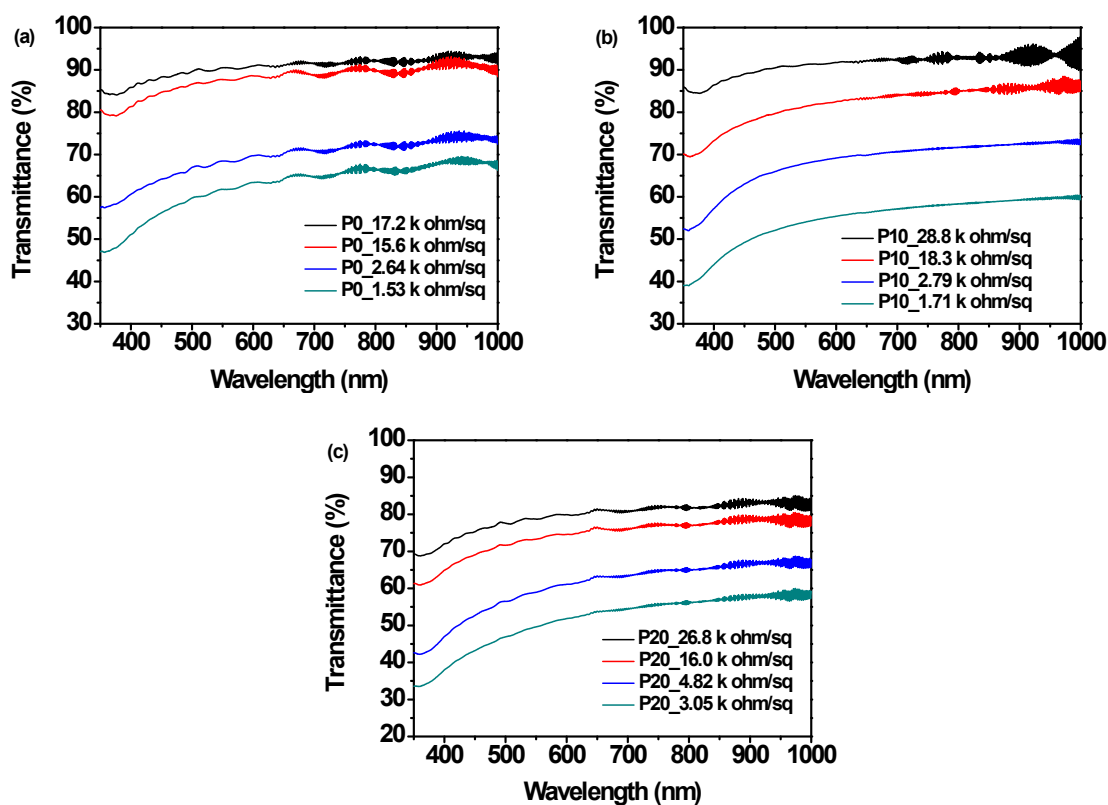

Figure S1. Sheet resistance and transmittance at 550 nm of rGO thin films with different sizes followed the different probe sonication time 0 min, 10 min, and 20 min.

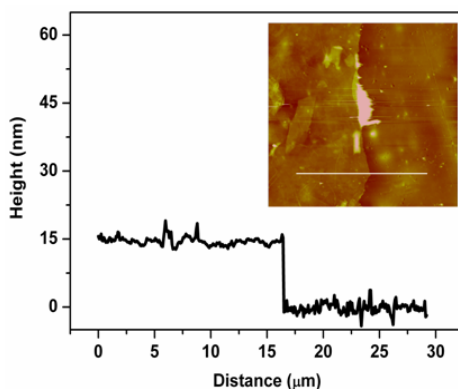

Figure S2. AFM image ( $42 \times 42 \mu\text{m}^2$ ) and section analysis of the thick rGO film on PET. The GO used for this rGO film is with size of  $1000 \sim 1200 \mu\text{m}^2$ , i.e. the largest GO sheets in this work.

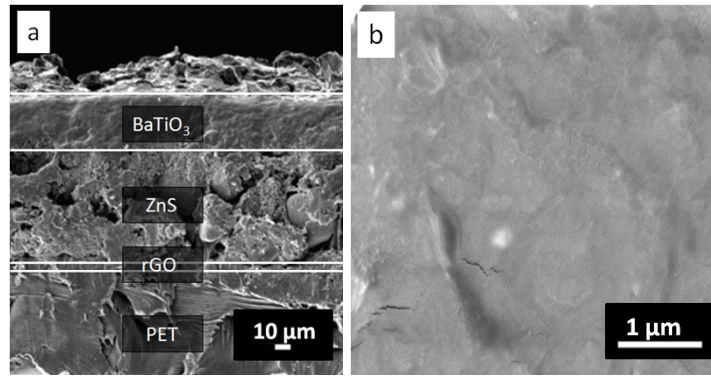

Figure S3. The SEM images of cross section of device B (a) and the magnified morphology of BaTiO<sub>3</sub> (b).

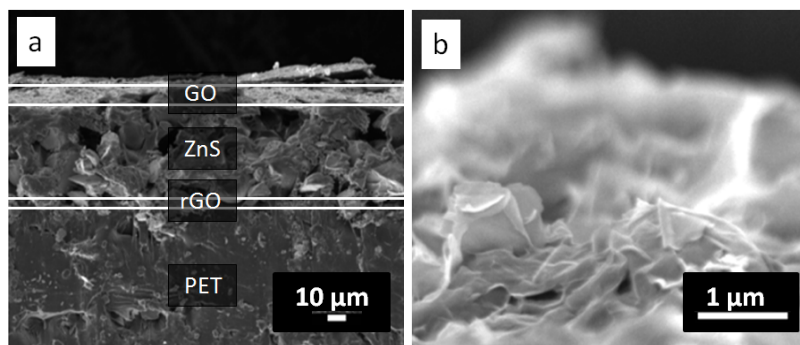

Figure S4. The SEM images of cross section of device C (a) and the magnified morphology of GO (b).

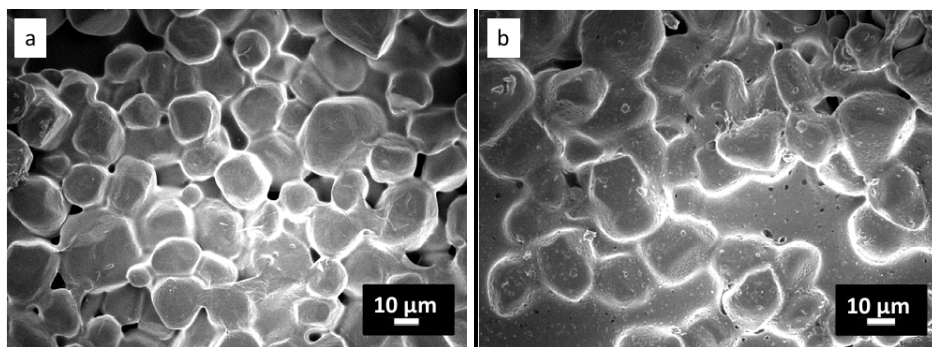

Figure S5 SEM image of commercial ZnS (a) and BaTiO<sub>3</sub> particles (b)

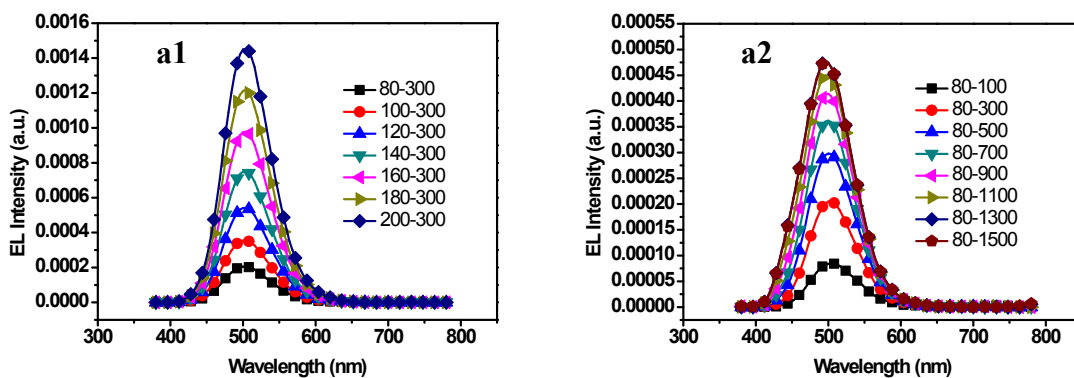

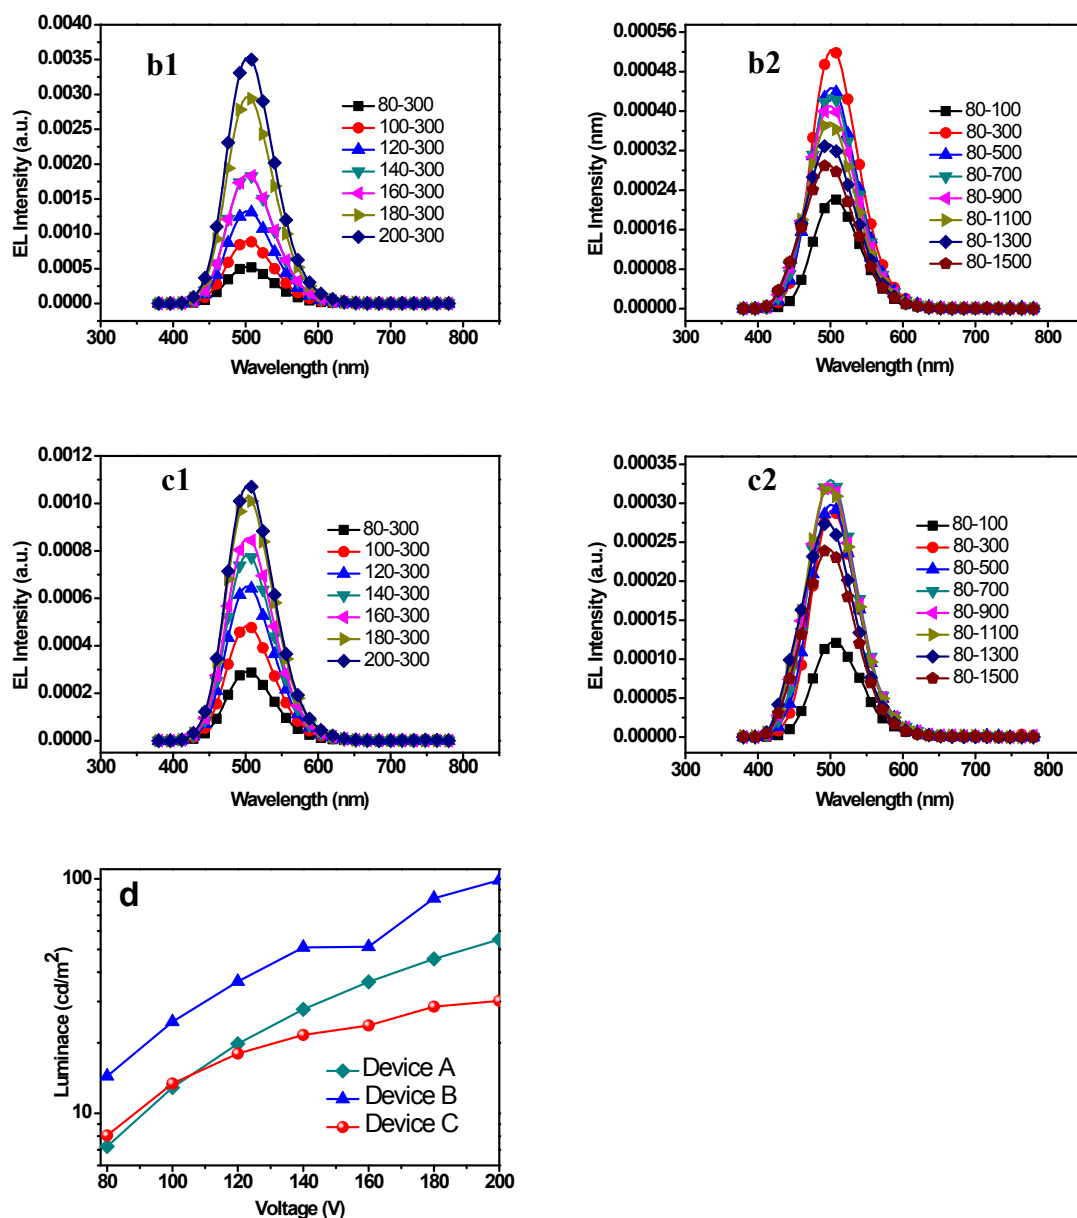

Figure S6. The AC-EL spectra of AC LED devices A, B and C at different voltages with the same frequency of 300 Hz (a1, b1, c1), and at different frequency with the same voltages of 80 V (a2, b2, c2). The extracted brightness change vs the applied voltages for devices A, B and C under the same frequency of 300 Hz (c).

Table S1. The relative peak area of GO and rGO.

| Peak area (%) |       |       |      |
|---------------|-------|-------|------|
| Sample        | C-C   | C-O   | C=O  |
| GO            | 42.72 | 49.96 | 7.31 |
| rGO           | 81.55 | 13.97 | 4.48 |

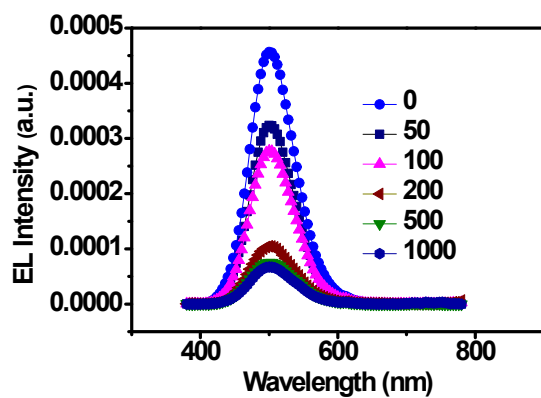

Figure S7. Electroluminescence (EL) spectra of GO dielectric layer based devices after different cycles of bending and releasing (0, 50, 100, 200, 500, 1000).
